# Supplementary material
Source: PubMed Central journal article supplement (PMC5559017)
Supplement: pnas.1703553114.sapp.pdf [file pnas.1703553114.sapp.pdf]

## SI Appendix

### Protein diversity in discrete structures at the distal tip of the trypanosome flagellum

Vladimir Varga, Flavia Moreira-Leite, Neil Portman and Keith Gull

## Materials and Methods

### Structure immunoprecipitation approach

#### Flagellar cytoskeleton preparation using 1 M NaCl

5 x 10<sup>9</sup> FCP1-YFP expressing procyclic cells were lysed with 1% Igepal CA-630 in PEME (100 mM PIPES pH 6.9, 1 mM MgSO<sub>4</sub>, 2 mM EGTA, 0.1 mM EDTA) supplemented with Protease Inhibitors (PIs: 50 μM Leupeptin, 7.5 μM Pepstatin A, 0.5 μM phenylmethylsulfonyl fluoride (Roche), 5 μM E-64-d (Enzo Life Sciences)). The lysate was spun for 5 min at 1800 g, and pellet (cytoskeletons) resuspended in cold 1 M NaCl in PEME supplemented with PIs, 200 μg/ml DNase I and 50 μg/ml RNase A. After a 30-min incubation on ice the material was spun for 20 min at 12000 g and pellet resuspended in PBS with PIs and 0.2% Igepal CA-630. Resulting flagellar cytoskeletons were sonicated for 8 x 10 s at 10 microns amplitude (Soniprep 150 ultrasonic disintegrator (MSE Sanyo)). The sonicated material (input) was incubated for 2.5 h with mouse monoclonal anti-GFP antibodies (Roche 11814460001) crosslinked to Dynabeads (Thermo Fisher Scientific) using dimethyl pimelimidate. The beads were pelleted and the supernatant (the unbound material) was retained for further analysis. After washes with PBS, 0.1% Igepal CA-630 the bound material was eluted from the beads by incubating them in 50 mM Tris pH 7.5, 0.3% SDS, 1 mM EDTA for 25 minutes with mild agitation. The bound and unbound material were fractionated by SDS-PAGE, proteins visualized by Sypro Ruby staining (Lonza), and each gel lane cut into horizontal slices. Proteins in the slices were digested by trypsin, resulting peptides separated using an Ultimate 3000 RSLCnano HPLC system (Dionex) and analyzed with an LTQ XLOrbitrap mass spectrometer (Thermo Scientific).

Peptides were identified by searching MS/MS spectra against a custom protein database based on *T. brucei* genome version 2.2 using the Central Proteomics Facility Pipeline version 1.2. (1). Proteins were identified at a 1% false discovery rate. Data from individual slices were pooled and protein abundance estimated using the SINQ tool (1). Protein species identified by at least two unique peptides and with probability = 1 in the bound material were considered. To calculate enrichment for proteins detected exclusively in the bound material, they were assigned an arbitrary abundance value in the unbound material, which was equivalent to half the SIN value of the least abundant protein of the unbound material.

### **Flagellar cytoskeleton preparation using 0.2 M NaCl**

For the FC SIP experiment cytoskeletons were prepared from  $1 \times 10^{10}$  FCP1-YFP expressing procyclic trypanosome cells as in the 1 M NaCl procedure. For the control SIP of the tripartite attachment complex cytoskeletons were prepared from  $1 \times 10^{10}$  YFP-TAC102 (Tb927.7.2390) expressing cells (2). The cytoskeletons were resuspended in PEME, 0.2 M NaCl, PIs, sonicated for  $3 \times 10$  seconds at 10 microns amplitude, followed by a 30 min incubation on ice. The material was spun for 30 min at 14000 g and pellet resuspended in 0.05% Igepal CA-630 in PBS, supplemented with PIs. Resulting flagellar cytoskeleton fragments were sonicated for  $6 \times 20$  s at 10 microns amplitude and added to Dynabeads with anti-GFP antibodies. The subsequent immunoprecipitation step and sample analysis were performed as in the 1 M NaCl procedure, except for omitting the strong tubulin band from analysis, analyzing the rest with a Q Exactive mass spectrometer (Thermo Scientific), and searching MS/MS spectra against a database based on *T. brucei* genome version 9.0 using the Central Proteomics Facility Pipeline version 2.1. Protein species identified by at least two spectral counts in the bound material were considered.

### **Immunofluorescence staining**

Procyclic cells were washed with PBS and settled on microscope slides. Cells were then either fixed for 30 min in  $-20^{\circ}\text{C}$  methanol, or, to extract cytoskeletons, incubated for 30 s in 1% Igepal CA-630 in PEME (100 mM PIPES pH 6.9, 1 mM  $\text{MgSO}_4$ , 2 mM EGTA, 0.1 mM EDTA) and fixed in  $-20^{\circ}\text{C}$  methanol. Slides were transferred to PBS and stored at  $+4^{\circ}\text{C}$  from 30 min to several days.

The mouse monoclonal AB1 antibody and the rabbit polyclonal anti-FTZC and anti-ClpGM6 (for flagellum attachment zone length measurements) antibodies were used following published protocols (3-5). They were detected with anti-mouse IgM-specific antibodies conjugated with TRITC (Millipore) or with anti-rabbit antibodies conjugated with TRITC (Jackson). Samples were mounted into 90% glycerol supplemented with 1% 1,4-antioxidant diazabicyclo[2.2.2]octane and 100 ng/ml of 4',6-diamidino-2-phenylindole (DAPI).

### **Transmission electron microscopy**

Cells were settled onto formvar coated nickel mesh grids (Agar Scientific) and incubated for 5 min with 1% Igepal CA-630 in PEME. After washes in PEME the grids were incubated for 30 min in 1% BSA in PBS, followed by a 45 min labelling with anti-GFP antibody (Invitrogen A11122) 500 x diluted in 1% BSA in PBS. The grids were washed with 1% BSA in PBS and labelled for 45 min with goat anti-rabbit antibody conjugated with 10nm gold (Sigma G7402) 50 x diluted in 1% BSA in PBS. Samples were fixed for 10 min in 2.5% glutaraldehyde in PEME, washed with PEME and  $\text{H}_2\text{O}$  and stained with 1 % aurothioglucose (UPS Reference Standard) in  $\text{H}_2\text{O}$ . The grids were allowed to dry before imaging them on a Tecnai12 TEM (FEI).

## Figures

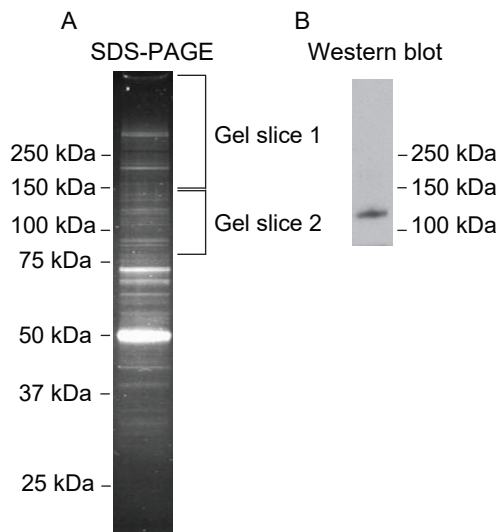

**Figure S1**

Proteomics indicates that the chimeric FCP1-YFP protein contains the C-terminal part of FCP1 and that the full-length FCP1 is also present.

A - The bound material fraction from the 1M NaCl SIP experiment (see Structure immunoprecipitation approach in Materials and Methods) was fractionated by SDS-PAGE. The gel lane was cut horizontally into slices, which were separately analyzed by mass spectrometry. Based on its predicted size of 237 kDa the full-length FCP1 is expected to be present in the slice 1 (top of the gel to 150 kDa).

B - A western blot of the bound material probed with an anti-YFP antibody. The chimeric FCP1-YFP protein was detected to migrate at around 120 kDa, and therefore was present in the slice 2 of the SDS-PAGE gel (150 kDa to 80 kDa).

C - Proteomics analysis of the gel slice 1 with respect to FCP1. Peptides identified by Mascot as stemming from this protein (red) are mapped on the FCP1 sequence. The coverage was 33% and the peptides were distributed along the sequence.

D - Mass spectrometry analysis of the gel slice 2 with respect to FCP1. Peptides identified as stemming from FCP1 (red) are concentrated in its C-terminal part. The coverage was 8%.

### C Gel slice 1

|      |             |             |             |             |             |
|------|-------------|-------------|-------------|-------------|-------------|
| 1    | MQMFLRRDST  | HCGTGTSHAS  | SLSPRYRHCC  | KVPFTFWASV  | LCIVSSTFLC  |
| 51   | SSGAASLVLR  | PNKPLVNVVF  | SVETTDQSIK  | ADIFVSRMST  | CDNTQIGGSK  |
| 101  | CKISKNAAPCN | FTVTSNDVGI  | DPWYDTKVRE  | VYICAGDAFP  | SLSLSVQLSL  |
| 151  | VEAIPRYLKR  | DVDNTRIFGD  | AVPVGTFITF  | HRNENCDDVS  | MIQGLPPAEL  |
| 201  | GSNREVRVTR  | SVQSVIYLCA  | KVPTSDGKTF  | VVPASVLLAV  | PRYDGNNTDA  |
| 251  | LRHTNETFRL  | EAVGNLWVAT  | FSQSPLCDPI  | LQDPVGGETL  | QVVNMEVSVF  |
| 301  | KGDYFLCNGW  | PYHKGGRLYS  | PSENKVTVRE  | YGVQPRTLYS  | GYGTRIKYTM  |
| 351  | DAATAANDV   | KLVLDFYMYS  | NCTGAVRVGD  | PSGIQYRGPP  | VKKRRSRSDG  |
| 401  | GAVALPVSGT  | YYACLEGSTT  | AYPKARAADV  | TVLPPPTVSF  | DEANVISGLD  |
| 451  | LTVLLSGHNA  | GRSGVITVGL  | SVTPECEELN  | SKGDVVRVGS  | SVTFRVPEDA  |
| 501  | LPNMTLCVAT  | PSSVDLQADE  | EPDEGYTFV   | KNIATRTRYKL | KHRTLFGVGA  |
| 551  | ETIHLNANVT  | LKAGTTGYFS  | LDNCLTPVGE  | TYSMNATALY  | GVAFSTAGRH  |
| 601  | VLCVKTPGTE  | HPVNRPYSNV  | GNVMVYGPAE  | LSPASIVKGV  | STPVKVS AVP |
| 651  | PEAPIVFSSES | ESCTPSISEV  | NATAEGEASV  | TVMRNTVGKV  | YVCVGYHSD   |
| 701  | GGAWKVRVSG  | MLAVSDVEVF  | PRTVVFVGSN  | RVNFIVPDKT  | SLKGLKLVFLK |
| 751  | ETSDVNCGEI  | VDDGTAVAIR  | ITEVGPAYVV  | YTAVMKKWK   | VCLWKGNGYE  |
| 801  | DVGLIQSQQQ  | LELVDPSPIG  | VVGLPLSMRF  | RGEALTALQP  | TRFLVSESY   |
| 851  | SCQSAPGGGI  | RVYEGEWVDP  | ISGSAEFPVV  | QKAGELHVCV  | GWGDTNESYY  |
| 901  | LYGGKVS AED | FAVDSLAVR   | RSTNNFVARP  | LLKKASLFLV  | RCVNAASC KV |
| 951  | PLNARICEEA  | TERYYTGPTT  | PLEDVLGLEY  | ALCQQDERRL  | GVAVGQKPLK  |
| 1001 | VINFPTASFN  | VSLVRKHTPL  | RLTLDGGS LH | IGASNLTVYI  | VPELNC TEA  |
| 1051 | NASYDSFPFA  | SGEHSKDVTI  | VKTPAVAKGA  | RVCVGISAYD  | KLPASTFNIF  |
| 1101 | HYMTPATIIA  | GRSVTVESSG  | IQSGRVRIST  | LEACTDSILS  | EYDVTIANSM  |
| 1151 | STLHVDKCKY  | RNRDLTDVYY  | CERGESGGYV  | MRGTMQLIHL  | DECPGGKQPA  |
| 1201 | VRPVTALPAK  | QVTDYGDICA  | ILTS PFLSTR | SDCNGVLSQS  | RATMTPRYNR  |
| 1251 | NLTFYVCTHT  | IRDPGYVFTT  | DGPTLSVENF  | RVVNPSIHGR  | VDSDEVLPG   |
| 1301 | ANLVMNYATR  | TPD TYLSDCA | VCGEKIVAAP  | GLAETPVEEA  | VTLIGISGVK  |
| 1351 | CVCVLGEQPT  | SPPIPVAEVL  | IITPPIVKKI  | DPAAVPTARF  | HAKLQTPVVS  |
| 1401 | GAKPLYSLVP  | GEDAENPLAY  | LHNSDFRGVY  | LSENACATTL  | TGNSVGYVRP  |
| 1451 | SGSVVLGPTF  | IPGRLPVS VL | CVGTPAGNLS  | VVSEVEVSTD  | IIFPSSFVLG  |
| 1501 | TEAEVYIPLS  | PNSAFRLRRD  | ASCGGEDVVP  | FFTDEEARG   | NISFKNVNAA  |
| 1551 | GLPSAGVWTL  | CQEVFDGSAT  | RPKIVKISAN  | GIAARVASAK  | QLLPTAQIET  |
| 1601 | FDPTYNIRG   | RDVLLGVPGV  | LYLMDLLYAE  | SLLPGFSTDR  | SCLRRNESHG  |
| 1651 | SWALVGD DDA | ASARRVSVTA  | QNGTDSIYFC  | ATTPVNR SVV | SVPLSSSLRF  |
| 1701 | IPPVSVFPSI  | VEPCKVTPLE  | SCRAPDSSHR  | QTVVRVIKGD  | CNPNPTDKGVT |
| 1751 | VGAESEGS DG | KCKLRMHNHK  | IRDYPAGTEF  | SVCAWDLT DN | TYCVTLGNVK  |
| 1801 | ASGDICGGSA  | WGPLMGAVI   | AIIVAAVLLF  | LLLLLLAVCF  | LRRCSSKEKE  |
| 1851 | ERQLVADK M  | QLDNLDMSCI  | SGTSPDPEYL  | ESGNNPLLLG  | FYSGDGSPNT  |
| 1901 | NTTARTMIDG  | MTSGVDDFAW  | GGDFPGRADW  | TSVEEQECDD  | RQJIALQEAR  |
| 1951 | DRYNMALVFT  | DGIERIRVDA  | KELELQFDYS  | GEFSMEYEGT  | GRGVNVP I P |
| 2001 | VTVPADHPDL  | LNAIYMRAS   | QRRRLQSQTR  | EEIEVSVHDT  | MSEMSTDVHD  |
| 2051 | TSRLTSYDMM  | SYTTTQHFYE  | ESTFMLESEA  | GRRMRLVNWE  | EEEQAI VDA  |
| 2101 | EFSDYVRLQQ  | AMRSIPLPLP  | QAVVLPFNST  | ATRGRDITNY  | SGHTHVDGEG  |
| 2151 | VTVLPVYDTP  | PFHNPAAASV  | DEAQAYPNHD  | EESNVLSLSD  | SSHN        |

### D Gel slice 2

|      |             |             |             |             |             |
|------|-------------|-------------|-------------|-------------|-------------|
| 1    | MQMFLRRDST  | HCGTGTSHAS  | SLSPRYRHCC  | KVPFTFWASV  | LCIVSSTFLC  |
| 51   | SSGAASLVLR  | PNKPLVNVVF  | SVETTDQSIK  | ADIFVSRMST  | CDNTQIGGSK  |
| 101  | CKISKNAAPCN | FTVTSNDVGI  | DPWYDTKVRE  | VYICAGDAFP  | SLSLSVQLSL  |
| 151  | VEAIPRYLKR  | DVDNTRIFGD  | AVPVGTFITF  | HRNENCDDVS  | MIQGLPPAEL  |
| 201  | GSNREVRVTR  | SVQSVIYLCA  | KVPTSDGKTF  | VVPASVLLAV  | PRYDGNNTDA  |
| 251  | LRHTNETFRL  | EAVGNLWVAT  | FSQSPLCDPI  | LQDPVGGETL  | QVVNMEVSVF  |
| 301  | KGDYFLCNGW  | PYHKGGRLYS  | PSENKVTVRE  | YGVQPRTLYS  | GYGTRIKYTM  |
| 351  | DAATAANDV   | KLVLDFYMYS  | NCTGAVRVGD  | PSGIQYRGPP  | VKKRRSRSDG  |
| 401  | GAVALPVSGT  | YYACLEGSTT  | AYPKARAADV  | TVLPPPTVSF  | DEANVISGLD  |
| 451  | LTVLLSGHNA  | GRSGVITVGL  | SVTPECEELN  | SKGDVVRVGS  | SVTFRVPEDA  |
| 501  | LPNMTLCVAT  | PSSVDLQADE  | EPDEGYTFV   | KNIATRTRYKL | KHRTLFGVGA  |
| 551  | ETIHLNANVT  | LKAGTTGYFS  | LDNCLTPVGE  | TYSMNATALY  | GVAFSTAGRH  |
| 601  | VLCVKTPGTE  | HPVNRPYSNV  | GNVMVYGPAE  | LSPASIVKGV  | STPVKVS AVP |
| 651  | PEAPIVFSSES | ESCTPSISEV  | NATAEGEASV  | TVMRNTVGKV  | YVCVGYHSD   |
| 701  | GGAWKVRVSG  | MLAVSDVEVF  | PRTVVFVGSN  | RVNFIVPDKT  | SLKGLKLVFLK |
| 751  | ETSDVNCGEI  | VDDGTAVAIR  | ITEVGPAYVV  | YTAVMKKWK   | VCLWKGNGYE  |
| 801  | DVGLIQSQQQ  | LELVDPSPIG  | VVGLPLSMRF  | RGEALTALQP  | TRFLVSESY   |
| 851  | SCQSAPGGGI  | RVYEGEWVDP  | ISGSAEFPVV  | QKAGELHVCV  | GWGDTNESYY  |
| 901  | LYGGKVS AED | FAVDSLAVR   | RSTNNFVARP  | LLKKASLFLV  | RCVNAASC KV |
| 951  | PLNARICEEA  | TERYYTGPTT  | PLEDVLGLEY  | ALCQQDERRL  | GVAVGQKPLK  |
| 1001 | VINFPTASFN  | VSLVRKHTPL  | RLTLDGGS LH | IGASNLTVYI  | VPELNC TEA  |
| 1051 | NASYDSFPFA  | SGEHSKDVTI  | VKTPAVAKGA  | RVCVGISAYD  | KLPASTFNIF  |
| 1101 | HYMTPATIIA  | GRSVTVESSG  | IQSGRVRIST  | LEACTDSILS  | EYDVTIANSM  |
| 1151 | STLHVDKCKY  | RNRDLTDVYY  | CERGESGGYV  | MRGTMQLIHL  | DECPGGKQPA  |
| 1201 | VRPVTALPAK  | QVTDYGDICA  | ILTS PFLSTR | SDCNGVLSQS  | RATMTPRYNR  |
| 1251 | NLTFYVCTHT  | IRDPGYVFTT  | DGPTLSVENF  | RVVNPSIHGR  | VDSDEVLPG   |
| 1301 | ANLVMNYATR  | TPD TYLSDCA | VCGEKIVAAP  | GLAETPVEEA  | VTLIGISGVK  |
| 1351 | CVCVLGEQPT  | SPPIPVAEVL  | IITPPIVKKI  | DPAAVPTARF  | HAKLQTPVVS  |
| 1401 | GAKPLYSLVP  | GEDAENPLAY  | LHNSDFRGVY  | LSENACATTL  | TGNSVGYVRP  |
| 1451 | SGSVVLGPTF  | IPGRLPVS VL | CVGTPAGNLS  | VVSEVEVSTD  | IIFPSSFVLG  |
| 1501 | TEAEVYIPLS  | PNSAFRLRRD  | ASCGGEDVVP  | FFTDEEARG   | NISFKNVNAA  |
| 1551 | GLPSAGVWTL  | CQEVFDGSAT  | RPKIVKISAN  | GIAARVASAK  | QLLPTAQIET  |
| 1601 | FDPTYNIRG   | RDVLLGVPGV  | LYLMDLLYAE  | SLLPGFSTDR  | SCLRRNESHG  |
| 1651 | SWALVGD DDA | ASARRVSVTA  | QNGTDSIYFC  | ATTPVNR SVV | SVPLSSSLRF  |
| 1701 | IPPVSVFPSI  | VEPCKVTPLE  | SCRAPDSSHR  | QTVVRVIKGD  | CNPNPTDKGVT |
| 1751 | VGAESEGS DG | KCKLRMHNHK  | IRDYPAGTEF  | SVCAWDLT DN | TYCVTLGNVK  |
| 1801 | ASGDICGGSA  | WGPLMGAVI   | AIIVAAVLLF  | LLLLLLAVCF  | LRRCSSKEKE  |
| 1851 | ERQLVADK M  | QLDNLDMSCI  | SGTSPDPEYL  | ESGNNPLLLG  | FYSGDGSPNT  |
| 1901 | NTTARTMIDG  | MTSGVDDFAW  | GGDFPGRADW  | TSVEEQECDD  | RQJIALQEAR  |
| 1951 | DRYNMALVFT  | DGIERIRVDA  | KELELQFDYS  | GEFSMEYEGT  | GRGVNVP I P |
| 2001 | VTVPADHPDL  | LNAIYMRAS   | QRRRLQSQTR  | EEIEVSVHDT  | MSEMSTDVHD  |
| 2051 | TSRLTSYDMM  | SYTTTQHFYE  | ESTFMLESEA  | GRRMRLVNWE  | EEEQAI VDA  |
| 2101 | EFSDYVRLQQ  | AMRSIPLPLP  | QAVVLPFNST  | ATRGRDITNY  | SGHTHVDGEG  |
| 2151 | VTVLPVYDTP  | PFHNPAAASV  | DEAQAYPNHD  | EESNVLSLSD  | SSHN        |

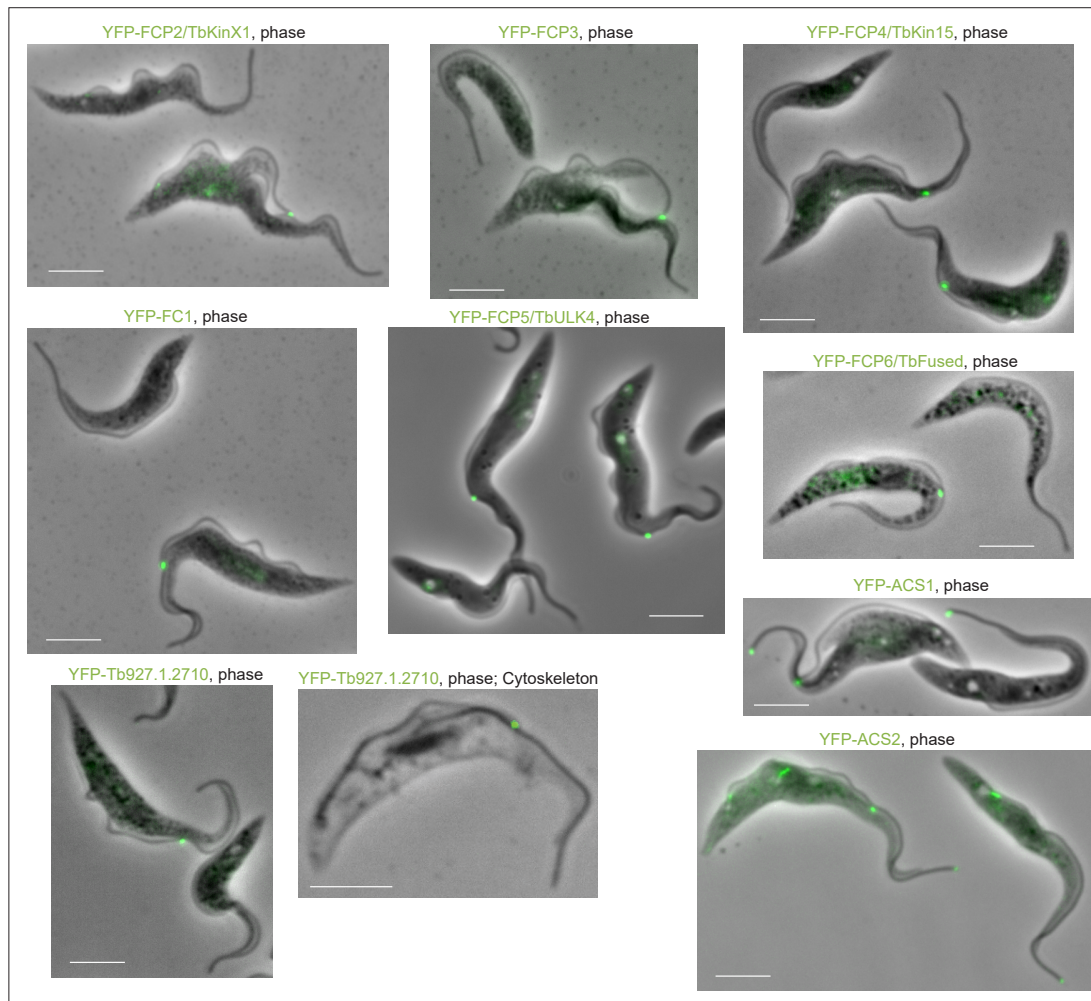

**Figure S2**

Fluorescence images of whole detergent untreated cells expressing YFP-tagged variants of the flagellum tip-localizing proteins (green) merged with phase contrast images. In the case of YFP-Tb927.1.2710 merged images of a cytoskeleton are also shown, demonstrating that the YFP signal is retained after detergent extraction. Scale bars denote 5  $\mu\text{m}$ .

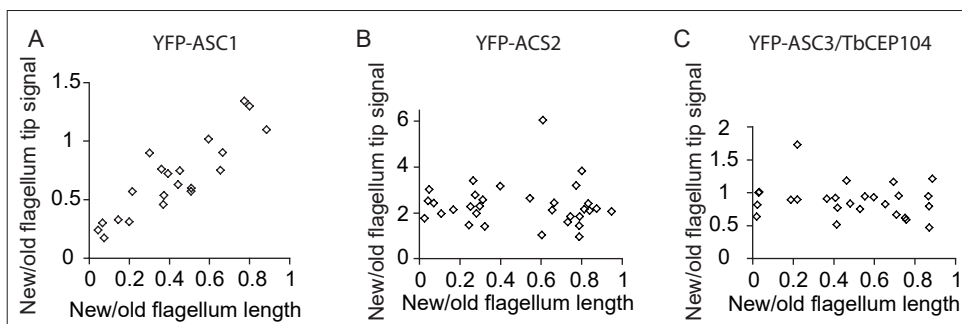

**Figure S3**

The ratio of YFP-protein signal intensities at the tip of the new versus the old flagellum plotted against the ratio of the new versus the old flagellum lengths.

A- YFP-ACS1

B- YFP-ACS2, the average new/old flagellum tip signal ratio was 2.2.

C- YFP-ACS3/TbCEP104, the average new/old flagellum tip signal ratio was 0.8.



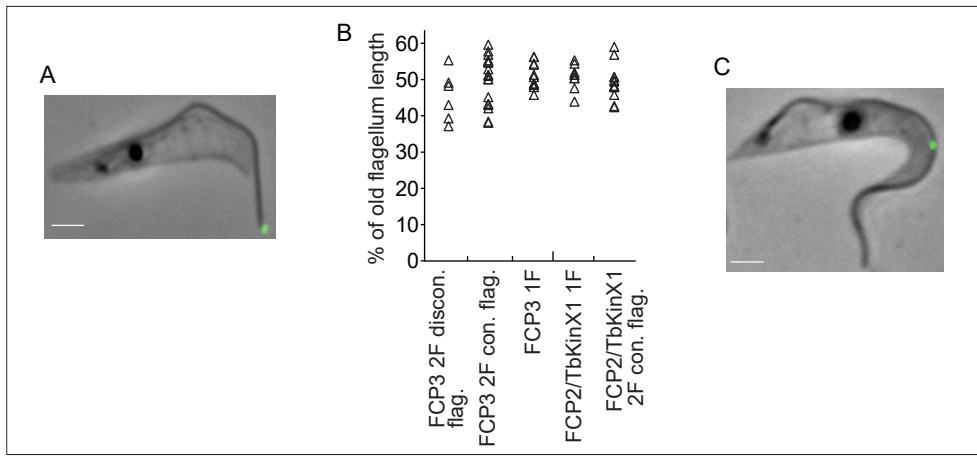

**Figure S4**

Certain FC constituents are retained in the flagella post cytokinesis.

A- An example of a 1F cell expressing YFP-FCP4/TbKin15 (green). In the population 10.4% of 1F cells possessed the flagellum-associated YFP signal, which was invariably present at the flagellar tip. Scale bar denotes 2  $\mu$ m.

B- The position of the YFP-FCP3 or YFP-FCP2/TbKinX1 signal along the flagellum (the old flagellum in the case of 2F cells in cytokinesis with connected or disconnected flagella) expressed as percentage of the length of the respective flagellum.

C- An example of a 1F cell expressing YFP-FCP3 (green). In the population 5.2% of 1F cells possessed the flagellum-associated YFP signal, which was present approximately half way along the flagellum. Scale bar denotes 2  $\mu$ m.

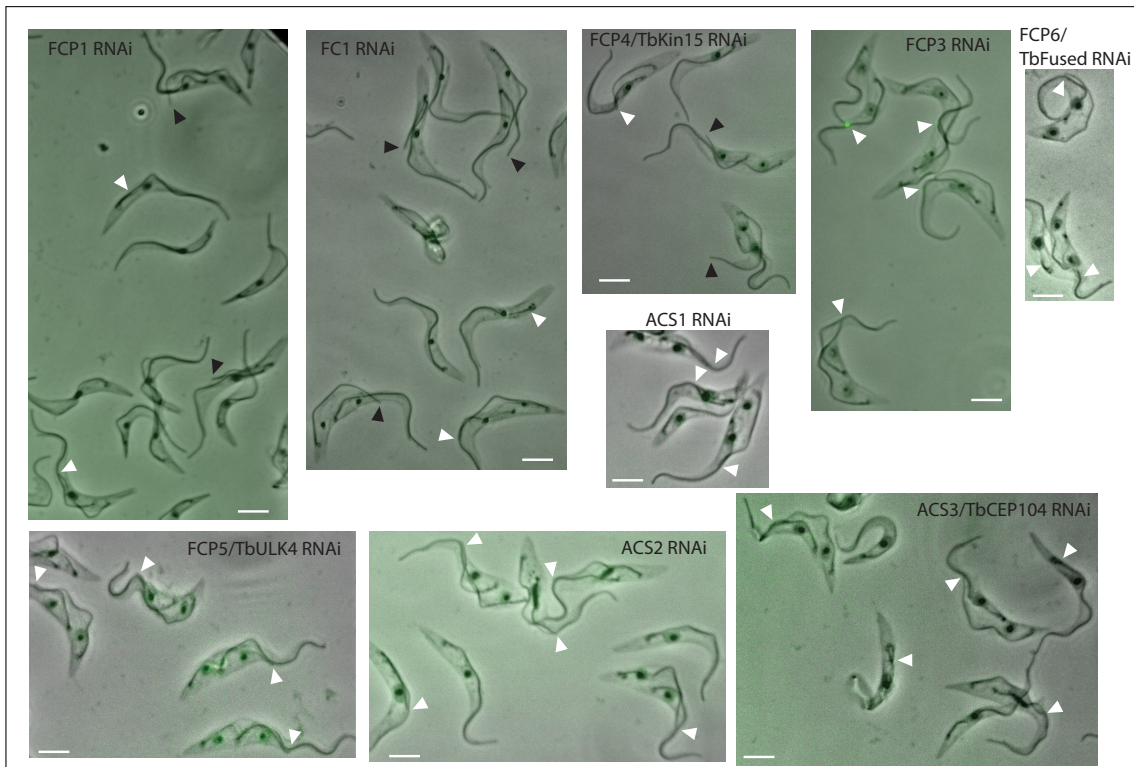

**Figure S5**

Phase contrast images of cytoskeletons prepared from cells depleted of individual FC or ACS constituents merged with the images of YFP fluorescence (green). The absence of detectable YFP signal in majority of cells indicates efficient protein depletion by RNAi. Black arrowheads denote tips of the new flagella not in contact with the old flagella, white arrowheads denote functional FCs. Scale bars denote 5  $\mu$ m.

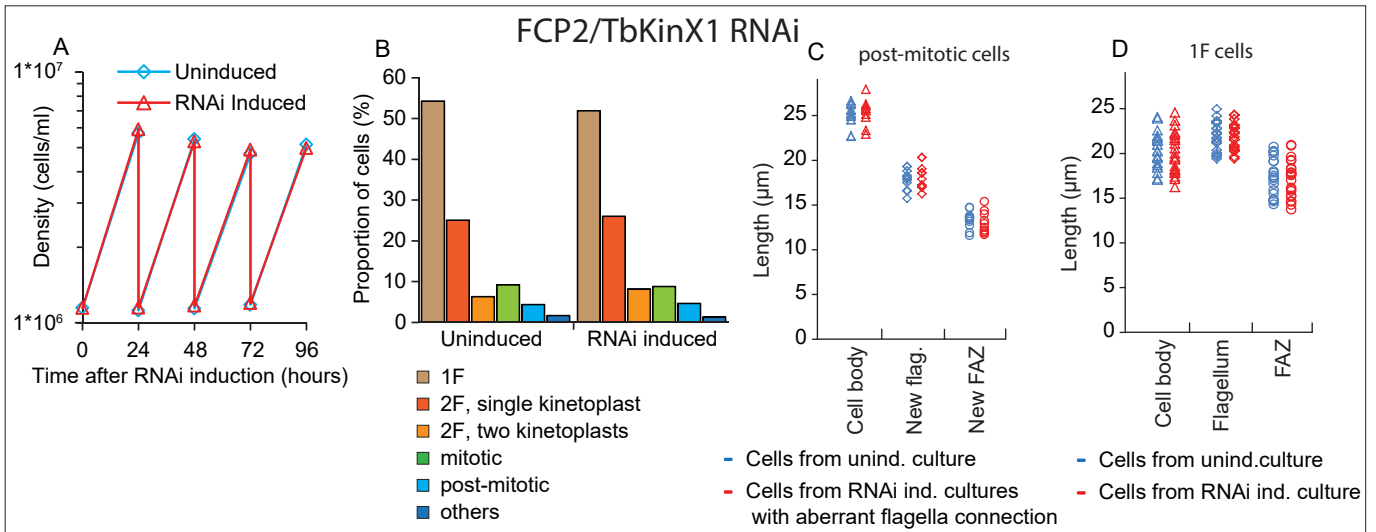

**Figure S6**

Depletion of FCP2/TbKinX1 has no major impact on cell cultures.

A- Growth curves of FCP2/TbKinX1 RNAi induced (red) and uninduced (blue) cell cultures. Cell densities were measured every 24 hours, and the cultures were subsequently diluted to approximately  $1 \times 10^6$  cells/ml.

B- Proportions of cells in various cell cycle stages in uninduced cell culture (left) and cell culture induced for 72 hours for FCP2/TbKinX1 RNAi (right).  $n > 500$  cells for each condition.

C- Morphometric measurements of post-mitotic cells from uninduced culture, which had functional FCs (blue), and of post-mitotic cells with aberrant FCs due to FCP2/TbKinX1 RNAi (red).

D- Morphometric measurements of 1F cells from uninduced (blue) and FCP2/TbKinX1 RNAi induced cell cultures (red).

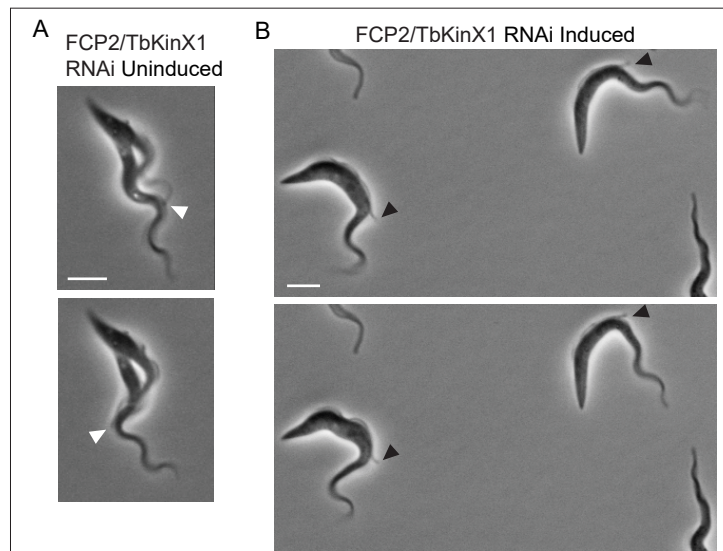

**Figure S7**

A- Two phase contrast images from a time-lapse movie of a live *T. brucei* cell with far progressed cytokinesis from an uninduced culture. Despite flagella beating the tip of the new flagellum is always connected to the old flagellum (white arrowheads), indicative of a functional FC. Scale bar denotes 5  $\mu$ m.

B- Two phase contrast images from a time-lapse movie of live *T. brucei* cells from a FCP2/TbKinX1 RNAi induced cell culture. The cells are not in cytokinesis, as judged by the absence of a visible cleavage furrow, yet the tips of their new flagella are not in close contact with the old flagella (black arrowheads). Scale bar denotes 5  $\mu$ m.

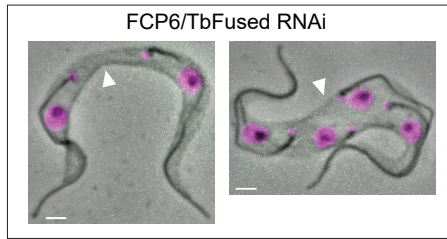

**Figure S8**

Examples of “double” cells, which are found in FCP6/TbFused RNAi induced cell cultures. Individual cells constituting these “double” cells are in a similar stage of the cell cycle (1F with a single kinetoplast on left, 2F post-mitotic on right), and their posterior ends are connected by a cytoskeletal bridge (arrowheads). Phase contrast images of cytoskeletons were overlaid with fluorescence images of DNA stain DAPI (magenta). Scale bars denote 2  $\mu$ m.

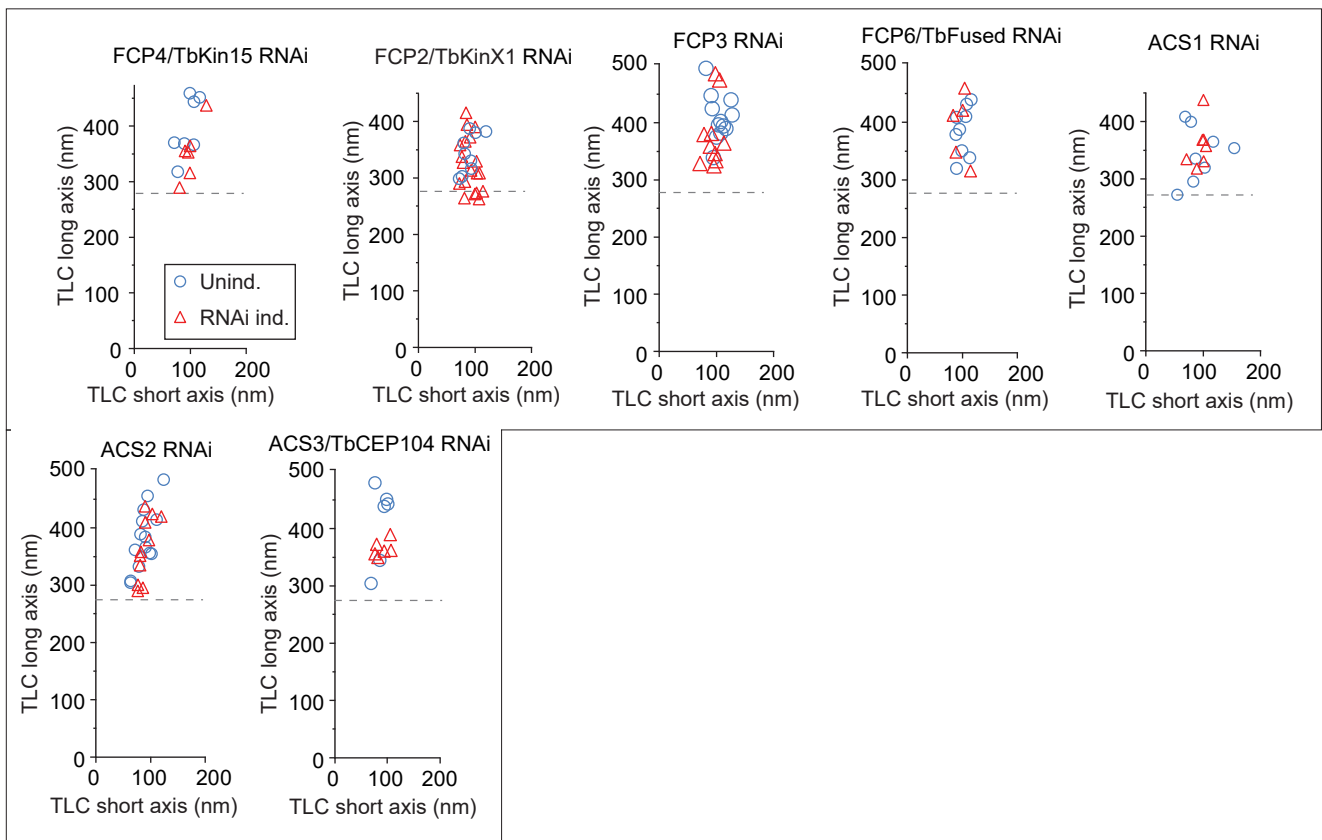

**Figure S9**

Plots of dimensions of the long axis of the TLC versus its short axis measured in cytoskeletons prepared from cells uninduced (blue circles) or induced (red triangles) for RNAi against individual FC or ACS constituents. Dotted lines indicate 280 nm, which is the smallest dimension of the long axis observed in uninduced cells. For none of the shown proteins is the TLC length difference between induced and uninduced cultures statistically significant at  $P < 0.05$ .

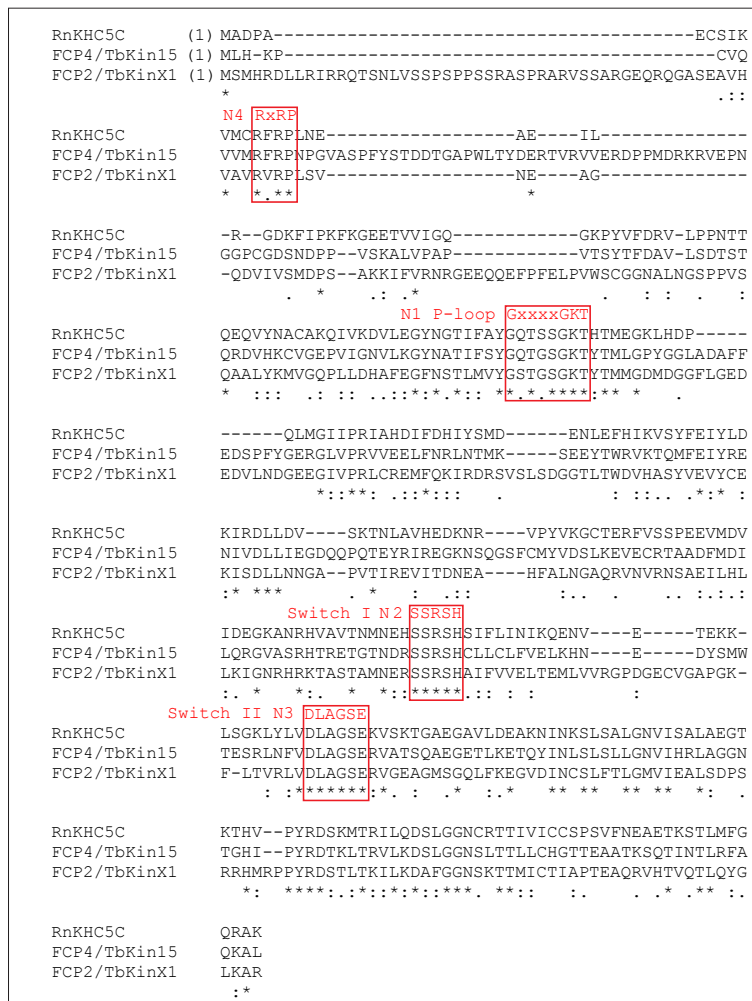

**Figure S10**

An alignment of kinesin motor domain sequences of FCP4/TbKin15, FCP2/TbKinX1 and rat Kinesin Heavy Chain 5C (RnKHC5C). Red boxes indicate four motifs involved in ATP binding and hydrolysis according to ref. 6.

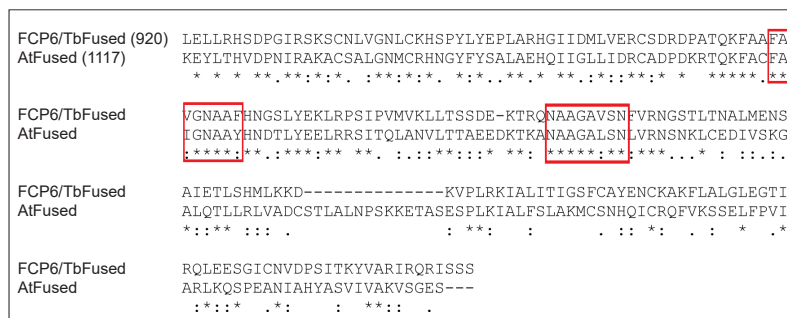

**Figure S11**

An alignment of C-terminal parts of FCP6/TbFused and of *Arabidopsis thaliana* Fused (Q2QAV0 in UniProtKB) proteins. Red boxes indicate motifs previously identified in *A. thaliana* Fused as required for interactions with *A. thaliana* kinesin-15s (7).

## Tables

**Table S1-** Quantification of the YFP/AB1 signal localization measurements

| YFP-tagged protein | YFP signal closer to the old flagellum | equal distance | YFP signal closer to the new flagellum |
|--------------------|----------------------------------------|----------------|----------------------------------------|
| FCP4/TbKin15       | 2                                      | 2              | 14                                     |
| ACS1               | 0                                      | 0              | 10                                     |
| ACS2               | 0                                      | 2              | 8                                      |
| ACS3/TbCEP104      | 0                                      | 0              | 10                                     |
| FCP1               | 8                                      | 5              | 4                                      |
| FC1                | 7                                      | 6              | 1                                      |
| FCP2/TbKinX1       | 14                                     | 1              | 0                                      |
| FCP3               | 17                                     | 1              | 2                                      |
| FCP5/TbULK4        | 13                                     | 0              | 0                                      |
| FCP6/TbFused       | 9                                      | 2              | 0                                      |

**Table S2-** Immunogold labeling quantification

| YFP-tagged protein   | Number of FCs examined | Total gold particles | % of gold particles         |           |                                        |
|----------------------|------------------------|----------------------|-----------------------------|-----------|----------------------------------------|
|                      |                        |                      | Old axoneme adjacent to TLC | TLC       | Distal portion of new axoneme plus ACS |
| <b>FCP1</b>          | 12                     | 325                  | 9                           | <b>70</b> | 21                                     |
| <b>FC1</b>           | 12                     | 162                  | 12                          | <b>80</b> | 7                                      |
| <b>FCP3</b>          | 12                     | 254                  | 9                           | <b>76</b> | 15                                     |
| <b>FCP4/TbKin15</b>  | 5                      | 337                  | 1                           | 18        | <b>81</b>                              |
| <b>ACS1</b>          | 8                      | 311                  | 0                           | 5         | <b>95</b>                              |
| <b>ACS2</b>          | 14                     | 129                  | 4                           | 9         | <b>87</b>                              |
| <b>ACS3/TbCEP104</b> | 6                      | 27                   | 7                           | 15        | <b>78</b>                              |



**Table S3-** Bioinformatics analysis of the identified flagellum tip proteins

| Name          | Tritryp (Tritrypdb.org) |                   |                  |                | Trans-membrane domains<br>(Phobius.sbc.su.se) | InterPro Domains<br>(E value below 1*10 <sup>-10</sup> )<br>(ebi.ac.uk/interpro/) | Evolutionary conservation<br>(ebi.ac.uk/Tools/hmmer/)                          | Publications regarding evolution, structure or function                     |
|---------------|-------------------------|-------------------|------------------|----------------|-----------------------------------------------|-----------------------------------------------------------------------------------|--------------------------------------------------------------------------------|-----------------------------------------------------------------------------|
|               | Gene ID                 | Isoelectric Point | Molecular Weight | Protein Length |                                               |                                                                                   |                                                                                |                                                                             |
| FCP1*         | Tb927.8.940             | 5.25              | 237461           | 2194           | 2 (aa 34-59 and 1814-1841)                    | No                                                                                | Trypanosoma cruzi, Leishmania, Leptomonas                                      | ref. 8                                                                      |
| FC1           | Tb927.11.1340           | 8.44              | 127907           | 1156           | 0                                             | 0054833 Protein kinase-like (PK-like), aa 125-366                                 | Leishmania, Leptomonas, Bodo, weaker homology to kinases from other eukaryotes | ref. 9                                                                      |
| FCP2/TbKinX1  | Tb927.3.4960            | 6.09              | 182491           | 1594           | 0                                             | IPR001752 Kinesin Motor Domain, aa 54-409                                         | well conserved accross eukaryotes                                              | ref. 10 - classified as the kinetoplastid specific kinesin-X1 family member |
| FCP3          | Tb927.8.7540            | 5.79              | 117856           | 1109           | 0                                             | No                                                                                | Trypanosoma cruzi, Leishmania, Leptomonas                                      |                                                                             |
| FCP4/TbKin15  | Tb927.10.890            | 5.29              | 323347           | 2889           | 0                                             | IPR001752 Kinesin Motor Domain, aa 4-391                                          | well conserved accross eukaryotes                                              | ref. 10 - classified as the ubiquitous kinesin-15 family member             |
| FCP5/TbULK4   | Tb927.11.8150           | 7.1               | 137803           | 1253           | 0                                             | 0054833 Protein kinase-like (PK-like), aa 1-272; 0054109 ARM repeat, aa 831-1228  | well conserved accross eukaryotes                                              | ref. 11                                                                     |
| FCP6/TbFused  | Tb927.11.4470           | 7.23              | 120659           | 1089           | 0                                             | 0054833 Protein kinase-like (PK-like), aa 1-255                                   | well conserved accross eukaryotes                                              | ref. 11                                                                     |
|               | Tb927.1.2710            | 8.69              | 75954            | 713            | 0                                             | No                                                                                | Trypanosoma cruzi, Leishmania, Leptomonas                                      |                                                                             |
| ACS1          | Tb927.7.6180            | 4.5               | 29957            | 278            | 0                                             | No                                                                                | Trypanosoma cruzi                                                              |                                                                             |
| ACS2          | Tb927.11.450            | 6.85              | 90205            | 821            | 0                                             | No                                                                                | Trypanosoma cruzi, Leishmania, Leptomonas                                      |                                                                             |
| ACS3/TbCEP104 | Tb927.10.14880          | 6.66              | 92733            | 850            | 0                                             | No                                                                                | well conserved in animals, Chlamydomonas, Giardia, Trichomonas, Leishmania     |                                                                             |

\* - the *T. brucei* genome also contains a second gene coding for FCP1, Tb927.8.960 (ref. 8)

**Table S4-** Results of the SIP experiment on flagellar cytoskeletons prepared using 0.2 M NaCl. Data for proteins enriched over 15-fold in the FCP1-YFP SIP are shown. The majority of the proteins were present also in the bound material of the control SIP targeting YFP-TAC102 at the proximal end of the flagellum, and were not considered for further analysis. Half of the remaining proteins including two novel proteins (in red) localize to the new flagellum tip. The rest of the proteins have other localizations (in blue) as determined by the TrypTag project (tryptag.org, ref. 12).

| Bound/<br>Unbound<br>enrichment<br>ranking | Protein ID           | Description                                                  | Length<br>aa | FCP1<br>Bound      |                                   | FCP1<br>Unbound    |                                   | Bound/<br>Unbound fold<br>enrichment | TAC102<br>Bound    | Note                   |
|--------------------------------------------|----------------------|--------------------------------------------------------------|--------------|--------------------|-----------------------------------|--------------------|-----------------------------------|--------------------------------------|--------------------|------------------------|
|                                            |                      |                                                              |              | Spectral<br>counts | MIC SIN<br>(Protein<br>abundance) | Spectral<br>counts | MIC SIN<br>(Protein<br>abundance) |                                      | Spectral<br>counts |                        |
| 1                                          | Tb927.11.6500        | 40S ribosomal protein S21, putative                          | 196          | 10.00              | 6.55E-05                          |                    | 2.0065E-10                        | 326538.7                             | 2.00               |                        |
| 2                                          | Tb927.11.2410        | hypothetical protein, conserved                              | 222          | 60.00              | 1.04E-05                          |                    | 2.0065E-10                        | 51731.9                              | 6.00               |                        |
| 3                                          | Tb927.6.5120         | 60S acidic ribosomal protein P2, putative                    | 107          | 5.00               | 2.48E-06                          |                    | 2.0065E-10                        | 12359.8                              |                    | likely ribosomal prot. |
| 4                                          | Tb927.10.2320        | hypothetical protein, conserved                              | 381          | 2.00               | 2.28E-06                          |                    | 2.0065E-10                        | 11353.1                              |                    | nucleus                |
| 5                                          | Tb927.7.230          | 40S ribosomal protein S33, putative                          | 103          | 8.00               | 2.10E-06                          |                    | 2.0065E-10                        | 10456.0                              |                    | likely ribosomal prot. |
| 6                                          | Tb927.10.3370        | 60S acidic ribosomal protein P2, putative                    | 114          | 3.00               | 1.67E-06                          |                    | 2.0065E-10                        | 8323.0                               | 2.00               |                        |
| 7                                          | Tb11.v5.1062         | chaperone protein DNAJ, putative                             | 370          | 5.00               | 9.06E-07                          |                    | 2.0065E-10                        | 4513.8                               | 4.00               |                        |
| 8                                          | Tb11.v5.0489         | retrotransposon hot spot (RHS) protein, putative             | 573          | 4.00               | 6.09E-07                          |                    | 2.0065E-10                        | 3037.1                               | 1.00               |                        |
| 9                                          | <b>Tb927.8.7540</b>  | hypothetical protein                                         | 1109         | 11.00              | 5.56E-07                          |                    | 2.0065E-10                        | 2771.0                               |                    | FCP3                   |
| 10                                         | Tb927.5.1820         | 60S acidic ribosomal protein, putative                       | 107          | 3.00               | 5.11E-07                          |                    | 2.0065E-10                        | 2547.2                               | 1.00               |                        |
| 11                                         | Tb927.10.15350       | histone H3 variant,H3V (h3vaR)                               | 139          | 2.50               | 2.96E-07                          |                    | 2.0065E-10                        | 1476.2                               | 1.50               |                        |
| 12                                         | <b>Tb927.11.1340</b> | hypothetical protein, conserved                              | 1156         | 8.00               | 2.56E-07                          |                    | 2.0065E-10                        | 1273.4                               |                    | FC1                    |
| 13                                         | Tb927.9.5690         | 60S acidic ribosomal protein, putative                       | 113          | 24.00              | 3.20E-05                          | 2.00               | 2.67E-08                          | 1199.9                               | 8.00               |                        |
| 14                                         | Tb927.9.9290         | Polyadenylate-binding protein 1 (PABP1)                      | 566          | 3.00               | 1.88E-07                          |                    | 2.0065E-10                        | 936.5                                |                    | cytoplasm              |
| 15                                         | Tb927.2.470          | retrotransposon hot spot protein 4 (RHS4), putative          | 860          | 3.50               | 1.12E-06                          | 1.00               | 1.25E-09                          | 899.0                                | 1.00               |                        |
| 16                                         | Tb927.4.4130         | hypothetical protein, conserved                              | 856          | 3.00               | 1.14E-07                          |                    | 2.0065E-10                        | 570.1                                | 3.00               |                        |
| 17                                         | Tb927.2.5970         | hypothetical protein, conserved                              | 420          | 2.00               | 1.07E-07                          |                    | 2.0065E-10                        | 535.3                                | 3.00               |                        |
| 18                                         | Tb927.11.11680       | 2-oxoglutarate dehydrogenase E2 component, putative          | 383          | 2.00               | 6.25E-08                          |                    | 2.0065E-10                        | 311.7                                |                    | basal body and cytopl. |
| 19                                         | Tb927.7.6360         | histone H2A variant,H2Az (h2aZ)                              | 179          | 12.00              | 2.31E-05                          | 3.00               | 7.51E-08                          | 307.7                                | 5.00               |                        |
| 20                                         | Tb927.10.6400        | chaperonin HSP60, mitochondrial precursor (HSP60)            | 562          | 27.00              | 3.41E-06                          | 2.00               | 1.22E-08                          | 280.0                                | 4.00               |                        |
| 21                                         | Tb927.10.8430        | 40S ribosomal protein S12, putative                          | 142          | 11.00              | 1.10E-04                          | 4.00               | 4.29E-07                          | 255.7                                | 4.00               |                        |
| 22                                         | Tb927.11.9720        | 40S ribosomal protein S27, putative                          | 86           | 13.00              | 7.78E-06                          | 1.00               | 3.17E-08                          | 245.3                                | 7.00               |                        |
| 23                                         | <b>Tb927.11.8150</b> | protein kinase, putative                                     | 1253         | 3.00               | 3.87E-08                          |                    | 2.0065E-10                        | 192.9                                |                    | FCP5/ULK4              |
| 24                                         | Tb927.1.2430         | histone H3, putative                                         | 133          | 33.50              | 4.20E-04                          | 7.00               | 2.31E-06                          | 181.7                                | 12.50              |                        |
| 25                                         | Tb927.11.6140        | 40S ribosomal protein S15A, putative                         | 130          | 24.00              | 1.21E-04                          | 9.00               | 9.10E-07                          | 132.6                                | 8.00               |                        |
| 26                                         | Tb927.9.15360        | 40S ribosomal protein S6, putative                           | 250          | 23.50              | 1.06E-04                          | 14.50              | 8.04E-07                          | 131.7                                | 16.00              |                        |
| 27                                         | <b>Tb927.1.2710</b>  | hypothetical protein, conserved                              | 713          | 2.00               | 2.29E-08                          |                    | 2.0065E-10                        | 114.3                                |                    | New flag. tip          |
| 28                                         | Tb927.10.7620        | mitochondrial ATP-dependent zinc metalloproteinase, putative | 657          | 2.00               | 3.16E-07                          | 1.00               | 3.94E-09                          | 80.2                                 | 1.00               |                        |
| 29                                         | Tb927.6.3740         | heat shock 70 kDa protein, mitochondrial precursor, putative | 657          | 8.00               | 1.49E-06                          | 3.00               | 2.15E-08                          | 69.5                                 | 4.00               |                        |
| 30                                         | Tb927.7.5340         | hypothetical protein, conserved                              | 498          | 3.00               | 4.63E-06                          | 8.00               | 7.89E-08                          | 58.7                                 | 2.00               |                        |
| 31                                         | Tb927.5.4170         | histone H4, putative                                         | 100          | 85.00              | 1.41E-04                          | 10.00              | 2.59E-06                          | 54.5                                 | 38.00              |                        |
| 32                                         | <b>Tb927.8.940</b>   | hypothetical protein, conserved                              | 2194         | 85.00              | 7.27E-06                          | 52.00              | 1.48E-07                          | 49.0                                 |                    | FCP1                   |
| 33                                         | Tb927.11.11360       | receptor for activated C kinase 1 (RACK1)                    | 318          | 80.00              | 2.14E-05                          | 8.00               | 4.40E-07                          | 48.6                                 | 13.00              |                        |
| 34                                         | Tb927.10.9650        | hypothetical protein, conserved                              | 1406         | 13.00              | 2.93E-06                          | 18.00              | 6.14E-08                          | 47.8                                 | 9.00               |                        |
| 35                                         | Tb927.7.2300         | Nucleoporin (TbNup132)                                       | 1203         | 10.00              | 3.46E-06                          | 13.00              | 7.46E-08                          | 46.4                                 | 7.00               |                        |
| 36                                         | Tb927.10.7410        | succinyl-CoA ligase [GDP-forming] beta-chain, putative       | 419          | 3.00               | 3.38E-07                          | 1.00               | 7.29E-09                          | 46.3                                 | 1.00               |                        |
| 37                                         | Tb927.11.15990       | nucleoporin Nup109 (TbNup109)                                | 1001         | 11.00              | 6.32E-07                          | 5.00               | 1.49E-08                          | 42.5                                 | 7.00               |                        |
| 38                                         | Tb927.11.9790        | calmodulin, putative                                         | 163          | 4.00               | 9.90E-07                          | 1.00               | 2.42E-08                          | 40.9                                 |                    | paraflagellar rod      |
| 39                                         | <b>Tb927.10.890</b>  | kinesin, putative                                            | 2889         | 37.00              | 5.65E-07                          | 9.00               | 1.44E-08                          | 39.2                                 | 4.00               | FCP4/TbKin15           |
| 40                                         | Tb927.11.6300        | 40S ribosomal protein S5, putative                           | 190          | 9.00               | 3.47E-06                          | 2.00               | 1.06E-07                          | 32.6                                 | 3.00               |                        |
| 41                                         | Tb927.10.2240        | hypothetical protein, conserved                              | 588          | 4.00               | 5.27E-06                          | 5.00               | 1.66E-07                          | 31.9                                 | 2.00               |                        |
| 42                                         | Tb927.4.3810         | DNA-directed RNA polymerase II subunit 2, putative, (RPB2)   | 1190         | 8.00               | 5.48E-07                          | 5.00               | 1.91E-08                          | 28.8                                 | 2.00               |                        |
| 43                                         | Tb927.9.5150         | ribosomal protein S6, putative,NHP2/RS6-like protein (NHP2)  | 126          | 9.00               | 6.41E-06                          | 3.00               | 2.55E-07                          | 25.1                                 | 4.00               |                        |
| 44                                         | <b>Tb927.3.4960</b>  | kinesin, putative                                            | 1594         | 92.00              | 1.77E-06                          | 24.00              | 7.33E-08                          | 24.2                                 |                    | FCP2/TbKinX1           |
| 45                                         | Tb927.10.190         | 40S ribosomal protein S6, putative                           | 250          | 8.00               | 2.69E-06                          | 3.00               | 1.16E-07                          | 23.2                                 | 2.00               |                        |
| 46                                         | Tb927.10.14180       | protein transport protein SEC13, putative                    | 374          | 6.00               | 7.91E-07                          | 2.00               | 3.83E-08                          | 20.6                                 | 2.00               |                        |
| 47                                         | Tb927.8.6150         | 40S ribosomal protein S8, putative                           | 220          | 42.00              | 1.87E-05                          | 5.00               | 9.47E-07                          | 19.7                                 | 8.00               |                        |
| 48                                         | Tb927.1.1620         | ATP-dependent DEAD/H RNA helicase, putative                  | 739          | 4.00               | 7.65E-07                          | 3.00               | 4.13E-08                          | 18.5                                 | 1.00               |                        |
| 49                                         | Tb927.11.2050        | 60S acidic ribosomal subunit protein, putative               | 324          | 68.00              | 9.35E-06                          | 16.00              | 5.30E-07                          | 17.7                                 | 15.00              |                        |
| 50                                         | Tb927.4.470          | snoRNP protein GAR1, putative                                | 229          | 6.00               | 1.37E-06                          | 2.00               | 7.98E-08                          | 17.2                                 | 2.00               |                        |
| 51                                         | Tb927.10.7680        | GTPase activating protein, putative                          | 530          | 9.00               | 1.62E-06                          | 9.00               | 9.51E-08                          | 17.0                                 | 13.00              |                        |
| 52                                         | Tb927.10.15410       | glycosomal malate dehydrogenase (gMDH)                       | 323          | 14.00              | 6.59E-06                          | 7.00               | 3.88E-07                          | 17.0                                 | 6.00               |                        |
| 53                                         | Tb927.11.6740        | pumilio/PUF RNA binding protein 10, putative                 | 683          | 19.00              | 9.88E-06                          | 35.00              | 6.21E-07                          | 15.9                                 | 22.00              |                        |
| 54                                         | Tb927.10.14820       | Mitochondrial ADP/ATP carrier protein 5c (MCP5c)             | 307          | 8.00               | 1.21E-05                          | 12.00              | 7.94E-07                          | 15.2                                 | 7.00               |                        |

**Table S5-** Quantification of 2F dividing cells with aberrant flagella connection. Total numbers of counted cells are indicated in brackets.

| Culture                    | %                                                                     |                                                                 |                                        |                                             |
|----------------------------|-----------------------------------------------------------------------|-----------------------------------------------------------------|----------------------------------------|---------------------------------------------|
|                            | 2F, single kinetoplast, single nucleus cells with aberrant connection | two kinetoplasts, single nucleus cells with aberrant connection | Mitotic cells with aberrant connection | Post-mitotic cells with aberrant connection |
| Parental strain SMOX P9    | 0.0 (n=276)                                                           | 0.0 (n=96)                                                      | 0.0 (n=31)                             | 2.6 (n=39)                                  |
| FCP1 Uninduced             | 0.0 (n=131)                                                           | 0.0 (n=37)                                                      | 0.0 (n=26)                             | 0.0 (n=24)                                  |
| FCP1 RNAi Induced          | 1.4 (n=144)                                                           | 7.5 (n=40)                                                      | 27.7 (n=65)                            | 45.6 (n=57)                                 |
| FC1 Uninduced              | 0.0 (n=140)                                                           | 0.0 (n=41)                                                      | 5.7 (n=35)                             | 7.4 (n=27)                                  |
| FC1 RNAi Induced           | 2.6 (n=307)                                                           | 11.3 (n=71)                                                     | 19.1(n=68)                             | 52.1 (n=71)                                 |
| FCP4/TbKin15 Uninduced     | 0.0 (n=157)                                                           | 0.0 (n=43)                                                      | 0.0 (n=46)                             | 0.0 (n=27)                                  |
| FCP4/TbKin15 RNAi Induced  | 11.5 (n=174)                                                          | 20.4 (n=49)                                                     | 42.9 (n=49)                            | 45.3 (n=64)                                 |
| FCP2/TbKinX1 Uninduced     | 0.0 (n=348)                                                           | 0.7 (n=147)                                                     | 0.0 (n=104)                            | 7.4 (n=88)                                  |
| FCP2/TbKinX1 RNAi Induced  | 10.1 (n=503)                                                          | 38.0 (n=205)                                                    | 53.8 (n=156)                           | 67.3 (n=98)                                 |
| FCP2/TbKinX1 Knock out     | 5.8 (n=86)                                                            | 33.3 (n=48)                                                     | 45.5 (n=55)                            | 66.7 (n=39)                                 |
| FCP3 Uninduced             | 0.0 (n=154)                                                           | 0.0 (n=67)                                                      | 0.0 (n=30)                             | 5.3 (n=19)                                  |
| FCP3 RNAi Induced          | 0.0 (n=149)                                                           | 0.0 (n=69)                                                      | 0.0 (n=36)                             | 0.0 (n=25)                                  |
| FCP5/TbULK4 Uninduced      | 0.0 (n=121)                                                           | 0.0 (n=27)                                                      | 0.0 (n=25)                             | 0.0 (n=25)                                  |
| FCP5/TbULK4 RNAi Induced   | 0.0 (n=115)                                                           | 0.0 (n=25)                                                      | 0.0 (n=22)                             | 0.0 (n=45)                                  |
| FCP6/TbFused Uninduced     | 0.0 (n=136)                                                           | 0.0 (n=52)                                                      | 0.0 (n=34)                             | 5.8 (n=86)                                  |
| FCP6/TbFused RNAi Induced  | 0.0 (n=111)                                                           | 0.0 (n=47)                                                      | 0.0 (n=21)                             | 10.4 (n=54)                                 |
| ACS1 Uninduced             | 0.0 (n=147)                                                           | 0.0 (n=31)                                                      | 0.0 (n=48)                             | 10.5 (n=38)                                 |
| ACS1 RNAi Induced          | 0.0 (n=164)                                                           | 0.0 (n=50)                                                      | 0.0 (n=36)                             | 5.9 (n=34)                                  |
| ACS2 Uninduced             | 0.0 (n=100)                                                           | 0.0 (n=50)                                                      | 0.0 (n=59)                             | 1.5 (n=66)                                  |
| ACS2 RNAi Induced          | 0.0 (n=117)                                                           | 0.0 (n=50)                                                      | 0.0 (n=50)                             | 9.8 (n=41)                                  |
| ACS3/TbCEP104 Uninduced    | 0.0 (n=140)                                                           | 0.0 (n=53)                                                      | 0.0 (n=31)                             | 0.0 (n=36)                                  |
| ACS3/TbCEP104 RNAi Induced | 0.0 (n=125)                                                           | 3.8 (n=26)                                                      | 0.0 (n=19)                             | 6.5 (n=31)                                  |

## Dataset

**Part 1-** Results of the SIP experiment on flagellar cytoskeletons prepared using 1 M NaCl

**Part 2-** Results of the SIP experiment on flagellar cytoskeletons prepared using 0.2 M NaCl

**Part 3-** Details on preparation of constructs for genetic modification of trypanosomes

## References

1. Trudgian DC, et al. (2011) Comparative evaluation of label-free SINQ normalized spectral index quantitation in the central proteomics facilities pipeline. *Proteomics* 11(14):2790–2797.
2. Trikin R, et al. (2016) TAC102 Is a Novel Component of the Mitochondrial Genome Segregation Machinery in Trypanosomes. *PLoS Pathog* 12(5):e1005586–e1005586.
3. Hayes P, et al. (2014) Modulation of a cytoskeletal calpain-like protein induces major transitions in trypanosome morphology. *The Journal of Cell Biology* 206(3):377–384.
4. Briggs LJ, et al. (2004) The flagella connector of *Trypanosoma brucei*: an unusual mobile transmembrane junction. *Journal of Cell Science* 117(Pt 9):1641–1651.
5. Bringaud F, et al. (2000) Characterization and disruption of a new *Trypanosoma brucei* repetitive flagellum protein, using double-stranded RNA inhibition. *Molecular and Biochemical Parasitology* 111(2):283–297.
6. Sack S, et al. (1997) X-ray structure of motor and neck domains from rat brain kinesin. *Biochemistry* 36(51):16155–16165.
7. Oh SA, et al. (2012) Arabidopsis Fused kinase and the Kinesin-12 subfamily constitute a signalling module required for phragmoplast expansion. *Plant J* 72(2):308–319.
8. Portman N (2011) Deconstructing the trypanosome cytoskeleton: from structures to functions via components and complexes. PhD Thesis. University of Oxford.
9. McAllaster MR, et al. (2015) Proteomic identification of novel cytoskeletal proteins associated with TbPLK, an essential regulator of cell morphogenesis in *Trypanosoma brucei*. *Molecular Biology of the Cell* 26(17):3013–3029.
10. Wickstead B, Gull K, Richards TA (2010) Patterns of kinesin evolution reveal a complex ancestral eukaryote with a multifunctional cytoskeleton. *BMC Evol Biol* 10:110–110.
11. Jones NG, et al. (2014) Regulators of *Trypanosoma brucei* cell cycle progression and differentiation identified using a kinome-wide RNAi screen. *PLoS Pathog* 10(1):e1003886–e1003886.

12. Dean S, Sunter JD, Wheeler RJ (2017) TrypTag.org: A Trypanosome Genome-wide Protein Localisation Resource. *Trends in Parasitology*, 33(2):80–82.
13. Lacomble S, Vaughan S, Deghelt M, Moreira-Leite FF, Gull K (2012) A *Trypanosoma brucei* Protein Required for Maintenance of the Flagellum Attachment Zone and Flagellar Pocket ER Domains. *Protist* 163(4):602–615.
14. Kelly S, et al. (2007) Functional genomics in *Trypanosoma brucei*: A collection of vectors for the expression of tagged proteins from endogenous and ectopic gene loci. *Molecular and Biochemical Parasitology* 154(1):103–109.
15. Dean S, et al. (2015) A toolkit enabling efficient, scalable and reproducible gene tagging in trypanosomatids. *Open Biol* 5(1):140197–140197.
16. Wickstead B, Ersfeld K, Gull K (2002) Targeting of a tetracycline-inducible expression system to the transcriptionally silent minichromosomes of *Trypanosoma brucei*. *Molecular and Biochemical Parasitology* 125(1-2):211–216.
17. Inoue M, et al. (2005) The 14-3-3 proteins of *Trypanosoma brucei* function in motility, cytokinesis, and cell cycle. *J Biol Chem* 280(14):14085–14096.
18. Poon SK, Peacock L, Gibson W, Gull K, Kelly S (2012) A modular and optimized single marker system for generating *Trypanosoma brucei* cell lines expressing T7 RNA polymerase and the tetracycline repressor. *Open Biol* 2(2):110037–110037.
